# Supplementary material for: Agouti overexpression in a transgenic model regulates integrity, permeability and electrogenic amino acid transport in zebrafish intestine
Source: Frontiers journal article supplement (doi:10.3389/fmars.2022.1011702), 2022-11-23
Supplement: Data_Sheet_8.PDF [file Data_Sheet_8.PDF]

**Supplementary Table 5 Genes upregulated in ASIP overexpressing males of GO category “sterol and cholesterol biosynthesis” belonging to Biological Processes**

| Ensembl ID         | UniProtKB ID     | Gene name                                                                                                                       | Protein name | Function<br>UniProtKB/Swiss-Prot                                                                                                                                                                                                        | Link to human orthologue in GeneCards database                                                            | Associated keywords                                                                                                                                                                                                                                                                                        |
|--------------------|------------------|---------------------------------------------------------------------------------------------------------------------------------|--------------|-----------------------------------------------------------------------------------------------------------------------------------------------------------------------------------------------------------------------------------------|-----------------------------------------------------------------------------------------------------------|------------------------------------------------------------------------------------------------------------------------------------------------------------------------------------------------------------------------------------------------------------------------------------------------------------|
| ENSDARG00000042641 | CYP51_DANRE      | Lanosterol 14-alpha demethylase (LDM) (EC 1.14.14.154) (Cytochrome P450 family member 51) (CYP51) (Sterol 14-alpha demethylase) | cyp51        | FUNCTION: Catalyzes C14-demethylation of lanosterol; it transforms lanosterol into 4,4'-dimethyl cholesta-8,14,24-triene-3-beta-ol.                                                                                                     | <a href="#">CYP51A1 Gene - GeneCards</a>   <a href="#">CP51A Protein</a>   <a href="#">CP51A Antibody</a> | Cholesterol biosynthesis;Cholesterol metabolism;Endoplasmic reticulum;Heme;Iron;Lipid biosynthesis;Lipid metabolism;Membrane;Metal-binding;Monooxygenase;Oxidoreductase;Reference proteome;Steroid biosynthesis;Steroid metabolism;Sterol biosynthesis;Sterol metabolism;Transmembrane;Transmembrane helix |
| ENSDARG00000044642 | F1QG97_DANRE     | Sterol-C5-desaturase                                                                                                            | sc5d sc5dl   | Catalyzes a dehydrogenation to introduce C5-6 double bond into lathosterol in cholesterol biosynthesis                                                                                                                                  | <a href="#">SC5D Gene - GeneCards</a>   <a href="#">SC5D Protein</a>   <a href="#">SC5D Antibody</a>      | Membrane;Reference proteome;Transmembrane;Transmembrane helix                                                                                                                                                                                                                                              |
| ENSDARG00000052734 | A0A2R8QHL5_DANRE | 3-hydroxy-3-methylglutaryl-coenzyme A reductase (EC 1.1.1.34)                                                                   | hmgcra       | Catalyzes the conversion of (3S)-hydroxy-3-methylglutaryl-CoA (HMG-CoA) to mevalonic acid, the rate-limiting step in the synthesis of cholesterol and other isoprenoids, thus plays a critical role in cellular cholesterol homeostasis | <a href="#">HMGCR Gene - GeneCards</a>   <a href="#">HMDH Protein</a>   <a href="#">HMDH Antibody</a>     | Cholesterol biosynthesis;Cholesterol metabolism;Endoplasmic reticulum;Lipid biosynthesis;Lipid metabolism;Membrane;NADP;Oxidoreductase;Peroxisome;Reference proteome;Steroid biosynthesis;Steroid metabolism;Sterol biosynthesis;Sterol metabolism;Transmembrane;Transmembrane helix                       |
| ENSDARG00000079532 | F1R9J8_DANRE     | Zgc:194242                                                                                                                      | zgc:194242   | Putative methyltransferase                                                                                                                                                                                                              |                                                                                                           | Reference proteome                                                                                                                                                                                                                                                                                         |

|                    |                  |                                                 |        |                                                                                                                                                                                                                                                                               |                                                                                                          |                                                                                                                                                                                                                                                                                                      |
|--------------------|------------------|-------------------------------------------------|--------|-------------------------------------------------------------------------------------------------------------------------------------------------------------------------------------------------------------------------------------------------------------------------------|----------------------------------------------------------------------------------------------------------|------------------------------------------------------------------------------------------------------------------------------------------------------------------------------------------------------------------------------------------------------------------------------------------------------|
| ENSDARG00000079946 | F1QDN5_DANRE     | Squalene monooxygenase (EC 1.14.14.17)          | sqlea  | Catalyzes the stereospecific oxidation of squalene to (S)-2,3-epoxysqualene, and is considered to be a rate-limiting enzyme in steroid biosynthesis.                                                                                                                          | <a href="#">SQLE Gene - GeneCards</a>   <a href="#">ERG1 Protein</a>   <a href="#">ERG1 Antibody</a>     | Endoplasmic reticulum;FAD;Flavoprotein;Membrane;Oxidoreductase; Reference proteome;Transmembrane;Transmembrane helix                                                                                                                                                                                 |
| ENSDARG00000099336 | A0A0R4ICC6_DANRE | Diphosphomevalonate decarboxylase (EC 4.1.1.33) | mvda   | Catalyzes the ATP dependent decarboxylation of (R)-5-diphosphomevalonate to form isopentenyl diphosphate (IPP). Functions in the mevalonate (MVA) pathway leading to isopentenyl diphosphate (IPP), a key precursor for the biosynthesis of isoprenoids and sterol synthesis. | <a href="#">MVD Gene - GeneCards</a>   <a href="#">MVD1 Protein</a>   <a href="#">MVD1 Antibody</a>      | ATP-binding;Cholesterol biosynthesis;Cholesterol metabolism;Lipid biosynthesis;Lipid metabolism;Lyase;Nucleotide-binding;Proteomics identification;Reference proteome;Steroid biosynthesis;Steroid metabolism;Sterol biosynthesis;Sterol metabolism                                                  |
| ENSDARG00000103226 | A0A2R8QAT3_DANRE | 7-dehydrocholesterol reductase                  | dhcr7  | Delta7-Dehydrocholesterol reductase (DHCR) is a membrane-bound enzyme that catalyzes the final step of cholesterol biosynthesis (the reduction of the C7-8 double bond in 7-dehydrocholesterol to form cholesterol), using NADPH as a cofactor                                | <a href="#">DHCR7 Gene - GeneCards</a>   <a href="#">DHCR7 Protein</a>   <a href="#">DHCR7 Antibody</a>  | Cholesterol biosynthesis;Cholesterol metabolism;Lipid biosynthesis;Lipid metabolism;Membrane;Oxidoreductase;Reference proteome;Steroid biosynthesis;Steroid metabolism;Sterol biosynthesis;Sterol metabolism;Transmembrane;Transmembrane helix                                                       |
| ENSDARG00000030616 | B3DGS0_DANRE     | Endoplasmic reticulum membrane sensor NFE2L1    | nfe2l1 | Endoplasmic reticulum membrane sensor that translocates into the nucleus in response to various stresses to act as a transcription factor Constitutes a precursor of the transcription factor NRF1. Able to detect various cellular stresses, such as cholesterol             | <a href="#">NFE2L1 Gene - GeneCards</a>   <a href="#">NF2L1 Protein</a>   <a href="#">NF2L1 Antibody</a> | Activator;Cholesterol metabolism;Coiled coil;DNA-binding;Endoplasmic reticulum;Glycoprotein;Lipid metabolism;Lipid-binding;Membrane;Nucleus;Reference proteome;Repressor;Signal-anchor;Steroid metabolism;Sterol metabolism;Transcription;Transcription regulation;Transmembrane;Transmembrane helix |

|                    |              |                                                                  |        |                                                                                                                                                                                                                                                                                                                                                |                                                                                                          |                                                                                                                                                                                                                                                 |
|--------------------|--------------|------------------------------------------------------------------|--------|------------------------------------------------------------------------------------------------------------------------------------------------------------------------------------------------------------------------------------------------------------------------------------------------------------------------------------------------|----------------------------------------------------------------------------------------------------------|-------------------------------------------------------------------------------------------------------------------------------------------------------------------------------------------------------------------------------------------------|
|                    |              |                                                                  |        | excess, oxidative stress or proteasome inhibition                                                                                                                                                                                                                                                                                              |                                                                                                          |                                                                                                                                                                                                                                                 |
| ENSDARG00000053068 | F1QIJ9_DANRE | Cytochrome P450, family 8, subfamily B, polypeptide 1 (Fragment) | cyp8b1 | The cytochrome P450 proteins are monooxygenases which catalyze many reactions involved in drug metabolism and synthesis of cholesterol, steroids and other lipids.                                                                                                                                                                             | <a href="#">CYP8B1 Gene - GeneCards</a>   <a href="#">CP8B1 Protein</a>   <a href="#">CP8B1 Antibody</a> | Cholesterol metabolism;Endoplasmic reticulum;Heme;Iron;Lipid metabolism;Membrane;Metal-binding;Monooxygenase;Oxidoreductase;Proteomics identification;Reference proteome;Steroid metabolism;Sterol metabolism;Transmembrane;Transmembrane helix |
| ENSDARG00000089369 | E7FB58_DANRE | NADPH:adrenodoxin oxidoreductase, mitochondrial (EC 1.18.1.6)    | fdxr   | Serves as the first electron transfer protein in all the mitochondrial P450 systems including cholesterol side chain cleavage in all steroidogenic tissues, steroid 11-beta hydroxylation in the adrenal cortex, 25-OH-vitamin D3-24 hydroxylation in the kidney, and sterol C-27 hydroxylation in the liver. {ECO:0000256 ARBA:ARBA00003133}. | <a href="#">FDXR Gene - GeneCards</a>   <a href="#">ADRO Protein</a>   <a href="#">ADRO Antibody</a>     | FAD;Flavoprotein;Mitochondrion;NADP;Oxidoreductase; Proteomics identification;Reference proteome                                                                                                                                                |
| ENSDARG00000097556 | X1WEZ3_DANRE | Cytochrome P450, family 8, subfamily B, polypeptide 2 (Fragment) | cyp8b2 | The cytochrome P450 proteins are monooxygenases which catalyze many reactions involved in drug metabolism and synthesis of cholesterol, steroids and other lipids.                                                                                                                                                                             | <a href="#">CYP8B1 Gene - GeneCards</a>   <a href="#">CP8B1 Protein</a>   <a href="#">CP8B1 Antibody</a> | Cholesterol metabolism;Endoplasmic reticulum;Heme;Iron;Lipid metabolism;Membrane;Metal-binding;Monooxygenase;Oxidoreductase;Reference proteome;Steroid metabolism;Sterol metabolism;Transmembrane;Transmembrane helix                           |

Ensembl ID terms were retrieved with Uniprot (Retrieve / ID mapping (uniprot.org) in order to gain potential functionality of upregulated genes. Links to the human gene database GeneCards (GeneCards - Human Genes | Gene Database | Gene Search) are also provided. Gene functions were obtained from UniProtKB/Swiss-Prot database. All genes were upregulated during cholesterol biosynthesis but only those with blue background were upregulated in the sterol biosynthetic pathway/Go term.
